# Supplementary material for: Investigating molecular mechanisms in ischemic preconditioning-induced resiliency to severe acute global cerebral ischemia using a mouse model of chronic cerebral hypoperfusion
Source: Research Square preprint supplement (doi:10.21203/rs.3.rs-5804657/v1), 2025-01-31
Supplement: Supplementary file 1 [file f5b0954799439ddc3dcb3d8d.pdf]

## Supplementary

### **Investigating molecular mechanisms in ischemic preconditioning-induced resiliency to severe acute global cerebral ischemia using a mouse model of chronic cerebral hypoperfusion**

Roli Kushwaha<sup>1,3</sup>, Shashikant Patel<sup>1,3</sup>, Yuvaraj K S<sup>1</sup>, Pooja Sharma<sup>1</sup>, Arvind Kumar<sup>2,3</sup>, Sumana Chakravarty<sup>1,3\*</sup>

<sup>1</sup>Applied Biology, CSIR- Indian Institute of Chemical Technology (IICT), Hyderabad.

<sup>2</sup>CSIR-Centre for Cellular and Molecular Biology, Hyderabad

<sup>3</sup>Academy of Scientific and Innovative Research (AcSIR), Ghaziabad-201002, U.P, India.

\*Email: [sumanachak@iict.res.in](mailto:sumanachak@iict.res.in)

\* Corresponding Author:

Dr. Sumana Chakravarty,

Senior Principal Scientist,

Department of Applied Biology, CSIR- Indian Institute of Chemical Technology (IICT),  
Tarnaka, Hyderabad- 500007 (Telangana)

Email: [sumanachak@iict.res.in](mailto:sumanachak@iict.res.in); [sumana98@gmail.com](mailto:sumana98@gmail.com)

Phone: +91 040 27191856

FAX: 040 27193189

**Running Title:** *CCH induced ischemic resiliency*

## Normal distribution curve: GST and NDS

Normal QQ plot\_NDS MALE DAY 1

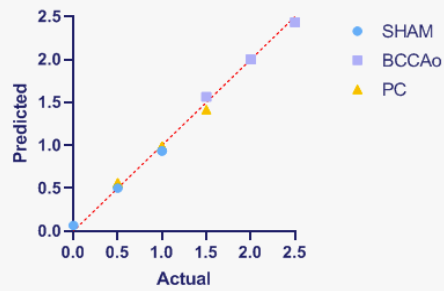

Normal QQ plot\_NDS MALE DAY 7

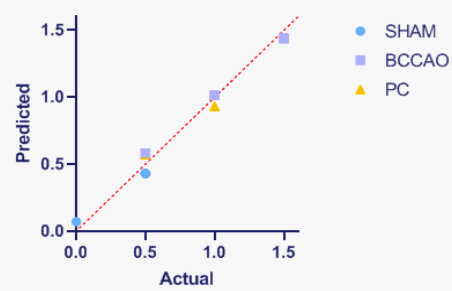

Normal QQ plot\_NDS FEMALE DAY 1

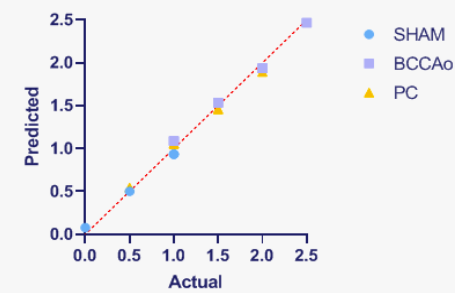

Normal QQ plot\_NDS FEMALE DAY 7

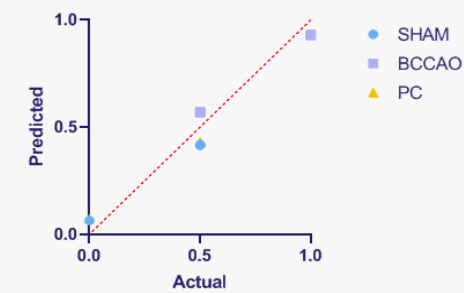

Normal QQ plot\_GST MALE DAY 1

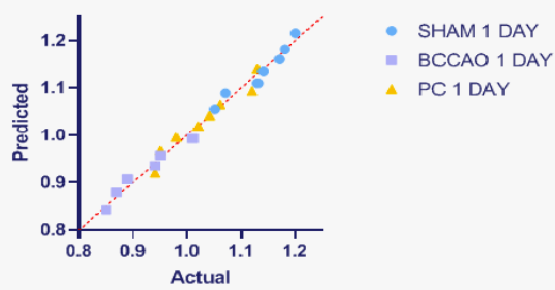

Normal QQ plot\_GST MALE DAY 7

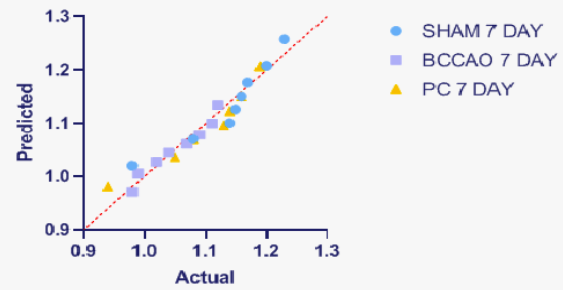

Normal QQ plot\_GST FEMALE DAY 1

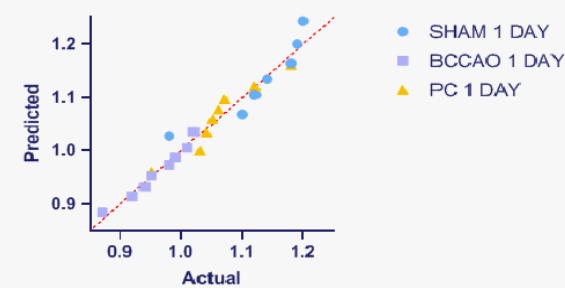

Normal QQ plot\_GST FEMALE DAY 7

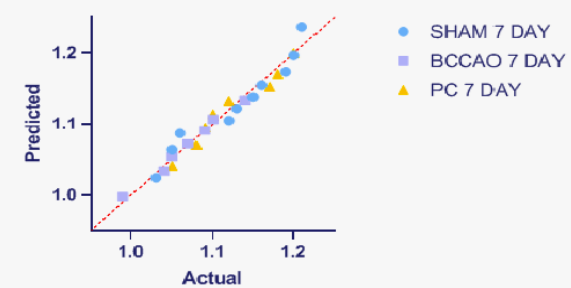

**Fig 1. Quantile-Quantile (Q-Q) plots** illustrating the comparison of observed data quantiles to theoretical normal distribution quantiles for neurodeficit scoring (NDS) and grip strength in male and female mice: The plots represent NDS and grip strength measurements for both sexes at two time points Day 1 and Day 7.

## Normal distribution curve: Rotarod and OFT

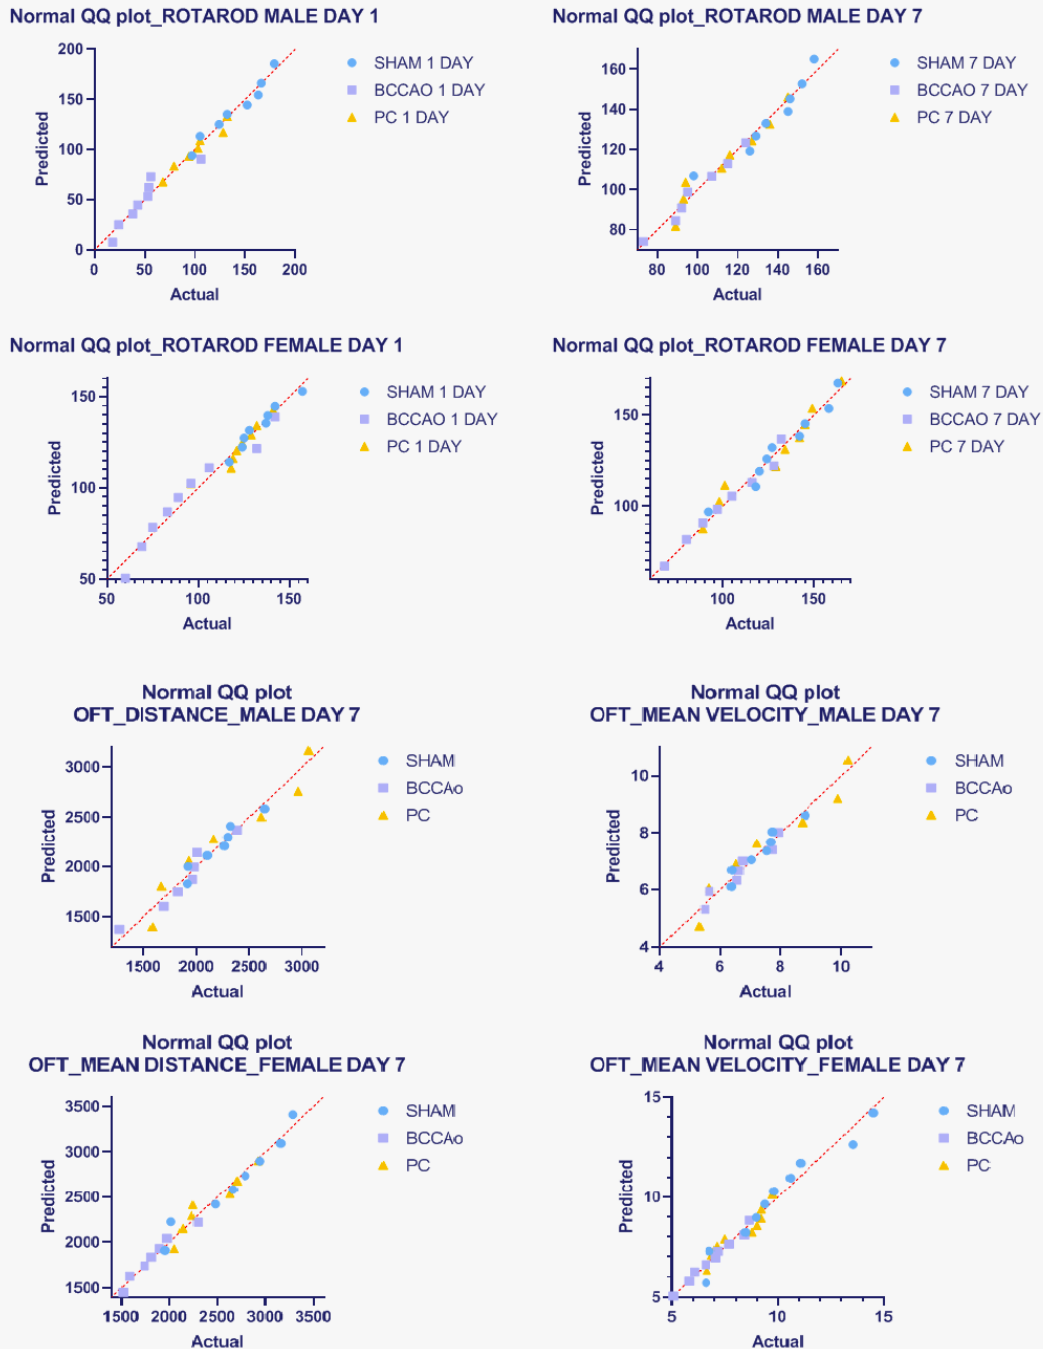

**Fig 2 Quantile-Quantile (Q-Q) plots** illustrating the comparison of observed data quantiles to theoretical normal distribution quantiles for open field test (OFT) parameters (distance traveled and velocity) and rotarod performance in male and female mice. The plots represent distance, velocity, and rotarod measurements for both sexes at two time points, Day 1 and Day 7.

## Normal distribution curve: NORT and Y maze

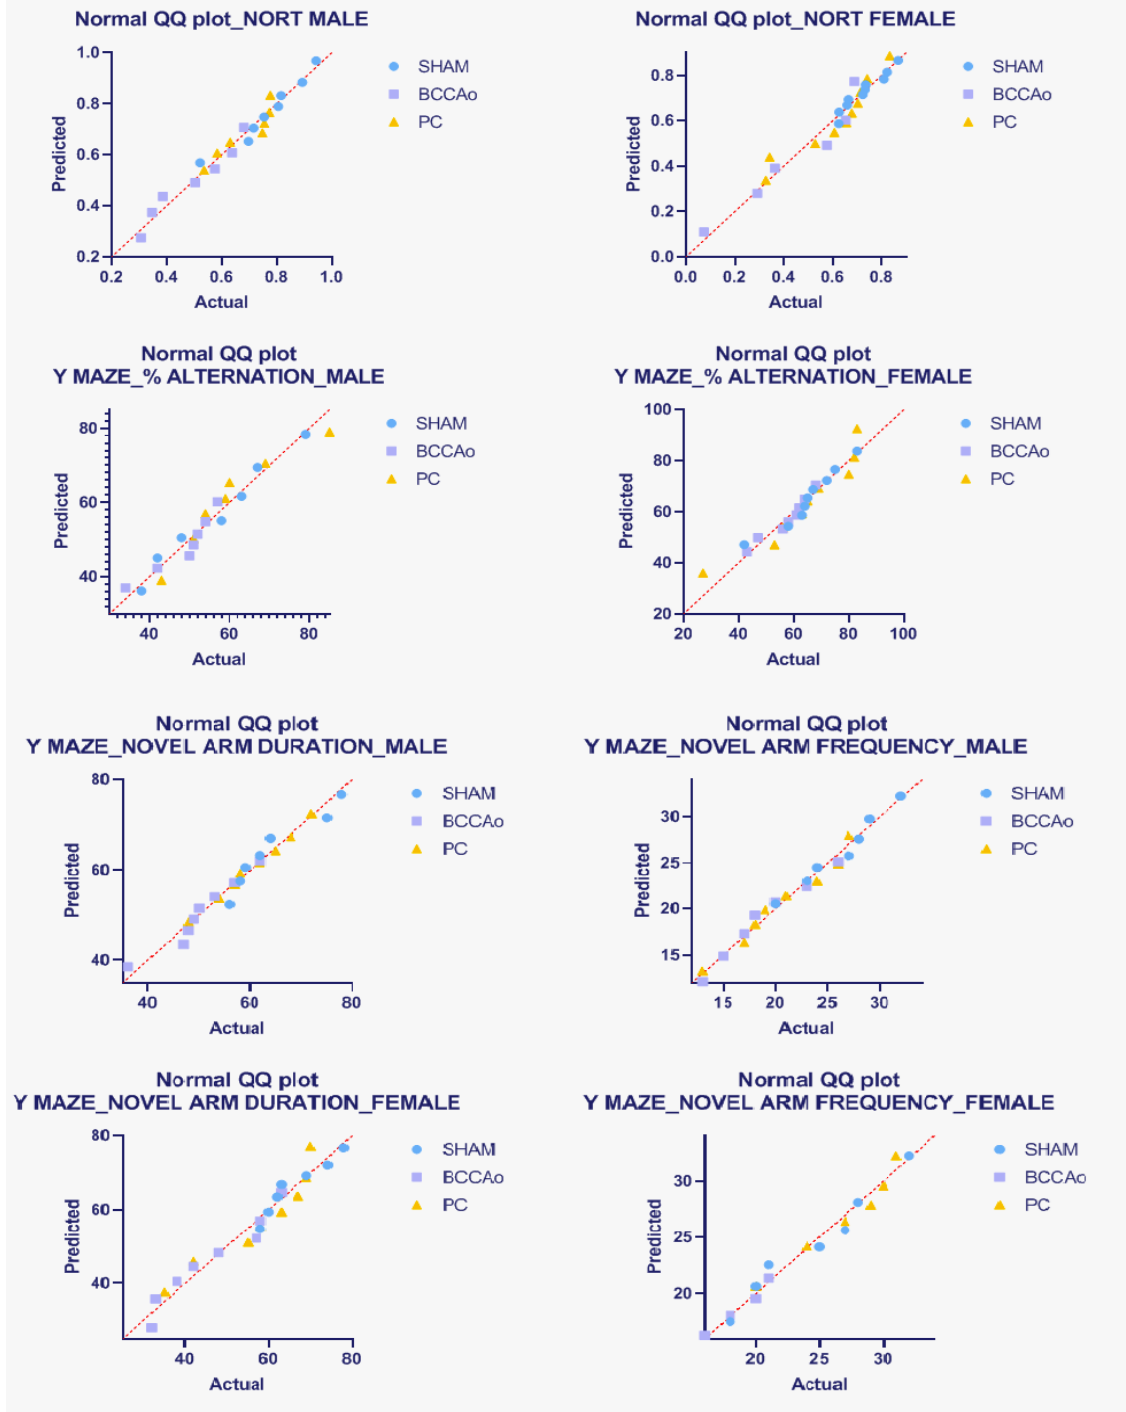

**Fig 3. Quantile-Quantile (Q-Q) plots** comparing observed data quantiles to theoretical normal distribution quantiles for novel object recognition test (NORT) discriminative index and Y-maze test parameters (percentage alternation, novel arm duration, and frequency) in male and female mice at Day 1 and Day 7.

Table 1: Primer Sequences for genes investigated in the study.

| <b>Primers</b> | <b>Sequences</b> |                          |
|----------------|------------------|--------------------------|
| <i>Hif1a</i>   | Forward          | ACGTGCTTGGTGCTGATTTGTGA  |
|                | Reverse          | ATTGAGCGGCCCAAAAGTTCTTCC |
| <i>Il1b</i>    | Forward          | TGGACCTTCCAGGATGAGGACA   |
|                | Reverse          | GTTTCATCTCGGAGCCTGTAGTG  |
| <i>Becn1</i>   | Forward          | CAGCCTCTGAAACTGGACACGA   |
|                | Reverse          | CTCTCCTGAGTTAGCCTCTTCC   |
| <i>Sox2</i>    | Forward          | AACGGCAGCTACAGCATGATGC   |
|                | Reverse          | CGAGCTGGTCATGGAGTTGTAC   |

Table 2: List of Antibodies: Their Catalog Numbers and Dilutions used in the study.

|   | <b>Antibody</b>                     | <b>Catalog No.</b> | <b>Dilutions</b> |
|---|-------------------------------------|--------------------|------------------|
| 1 | Anti PSD95 (anti mouse)             | MA1-046            | 1:1000           |
| 2 | Anti BDNF (anti rabbit)             | Ab226843           | 1:1000           |
| 3 | Anti Syn (anti mouse)               | MAB368             | 1:1000           |
| 4 | Anti $\alpha$ tubulin (anti rabbit) | Ab 15246           | 1:5000           |
| 5 | Goat anti-mouse secondary           | G21040             | 1:5000           |
| 6 | Goat anti-rabbit secondary          | G21234             | 1:5000           |
| 7 | GFAP (anti rabbit)                  | mAb#3670           | 1:200            |
| 8 | Iba1 (anti rabbit)                  | mAb#17198          | 1:200            |
| 9 | Alexa fluoro 555                    | 4413s              | 1:500            |

### **Hematoxylin and eosin (H&E)**

Striatal sections from 1 day post surgery were processed for hematoxylin and eosin (H&E) staining following a standard protocol. Briefly sections were deparaffinized in xylene for 1 minute each and rehydrated through a graded ethanol series. After staining with hematoxylin for 5 minutes, sections were gently rinsed under running tap water to remove excess stain, followed by counterstaining with eosin for 45 seconds. Dehydration was performed through a reverse ethanol series and sections were cleared in xylene for 1 minute before mounting with DPX.

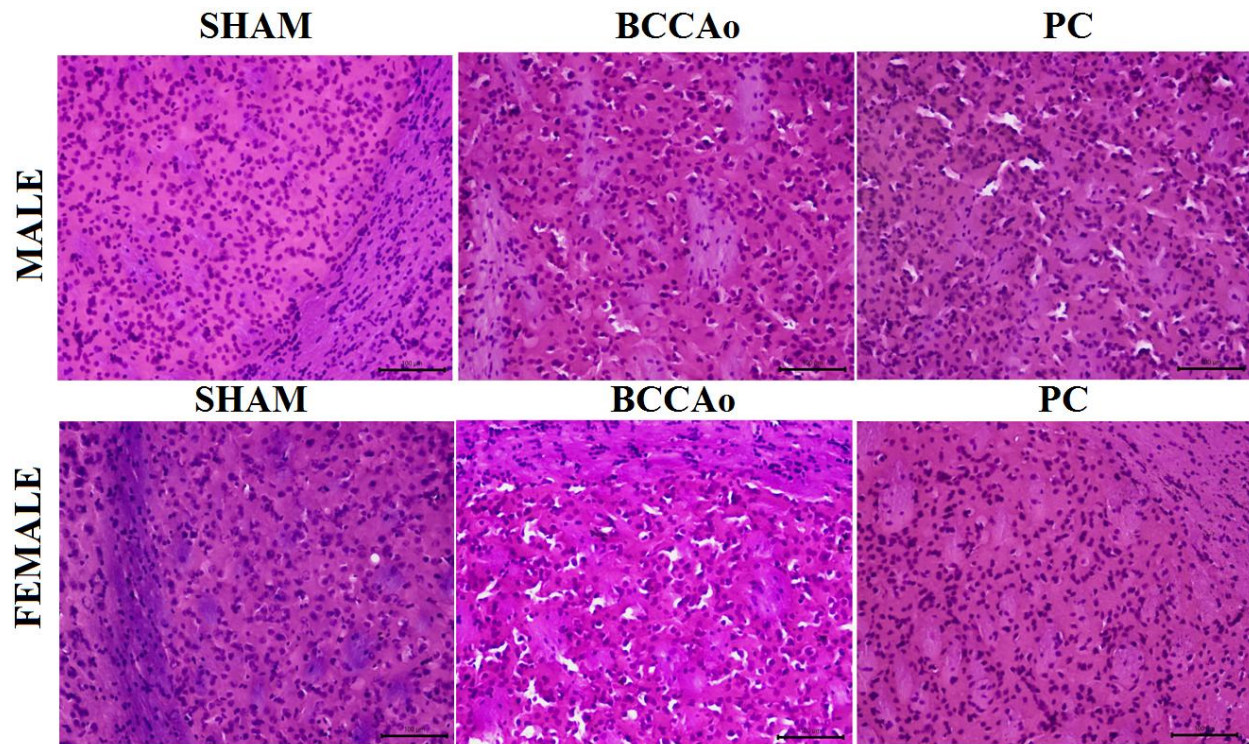

Fig 4: Hematoxylin and eosin (H&E) staining of brain sections from sham, BCCAO, and PC groups in male and female mice, highlighting histological differences across conditions.

Hematoxylin and eosin (H&E) staining highlights tissue architecture by staining nuclei blue with hematoxylin and cytoplasm and extracellular matrix pink with eosin. Representative H&E-stained images of striatal brain sections from sham-operated, bilateral common carotid artery occlusion (BCCAO), and preconditioning (PC) groups in both male and female mice after one day are shown. The sham group exhibits intact histological structure, while the BCCAO group shows subtle structural changes, indicating ischemic damage. The PC group demonstrates slight improvements compared to the BCCAO group, suggesting early protective effects of preconditioning. These findings provide a preliminary comparison of structural alterations across experimental groups and sexes.
